# Supplementary material
Source: Springer Nature journal article supplement (https://www.springermedizin.de/resource/supplementary/12888_2012_1464_MOESM1_ESM.pdf/9480360)
Supplement: MOESM1 [file 9480360]

## a. Representative actigraph data

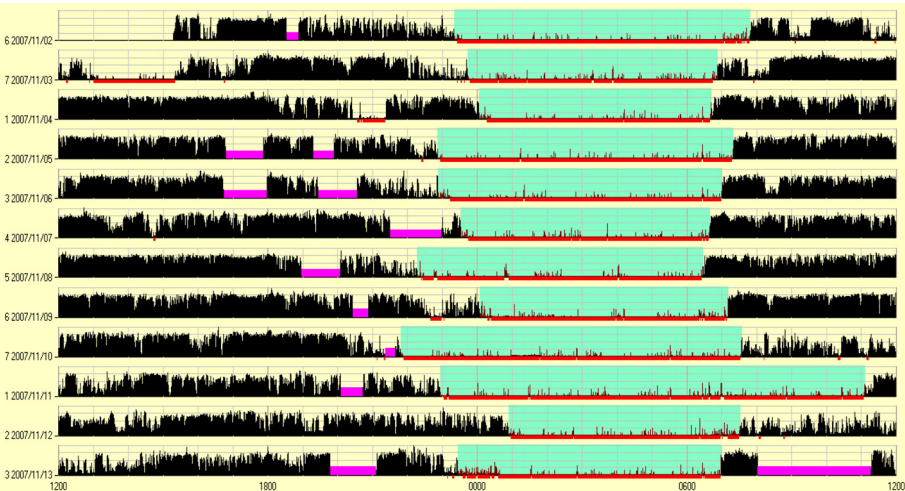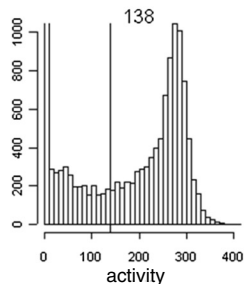

**b. Threshold determination by K-means clustering method**

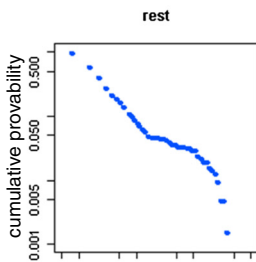

**c. rest**

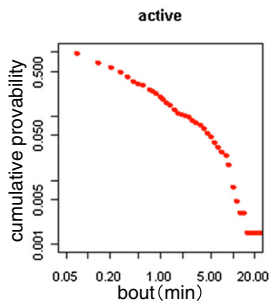

**d. Activity**
